# Supplementary material
Source: publisher site journal article supplement (https://aca.pensoft.net/article/download/suppl/4709473/)
Supplement: Supplementary file 1

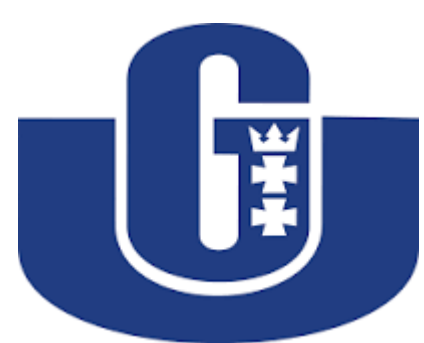

# The use of groundwater crustacean communities as indicators for aquifers quality in the semi-arid region of north-central Chile

Iepure Sanda<sup>1</sup>, Nicolas Gouin<sup>2</sup>, Angeline Bertin<sup>3</sup>, Ana Isabel Camacho<sup>4</sup>, González-Ramón Antonio<sup>5</sup>, C. Jimenez-Cisneros<sup>6</sup>, Tiziana Di Lorenzo<sup>7</sup>

<sup>1</sup> University of Gdańsk, Faculty of Biology, Department of Genetics and Biosystematics, Wita Stwosza 59, 80-308 Gdańsk, Poland, <sup>2</sup>CEAZA, Raúl Bitrán 1305, Campus Andrés Bello, Universidad de La Serena, La Serena, Chile <sup>3</sup>Universidad de La Serena, Raúl Bitrán 1305, Campus Andrés Bello, Chile <sup>4</sup>Museo Nacional de Ciencias Naturales, Jose Gutierrez Abascal, 2, 28006, Madrid, Spain <sup>5</sup>Instituto Geológico y Minero de España, C/ Ríos Rosas, 23 - 28003 Madrid, Spain, <sup>7</sup> Nacional Research Council, Institute of Ecosystem Study, Area di Ricerca di Firenze, Via Madonna del Piano, 10, Sesto Fiorentino, Italy

## BACKGROUND

Chile has large extensions of arid and semi-arid regions throughout the whole country, where the intensive demands and use of groundwater resources especially for irrigations and mining activities increased dramatically over the last decades. The aquifer depletions due to water abstraction for irrigation and nutrient loads exert major alterations of water quality, changes in groundwater recharge and of the natural renewal rate. All these factors diminish the aquifer value for users and contribute to the degradation of groundwater as environment and habitat for fauna. The intensive use of groundwater resources in Chile brought to significant social and economic benefits, however their inadequate management resulted in negative environmental, legal and socioeconomic consequences.

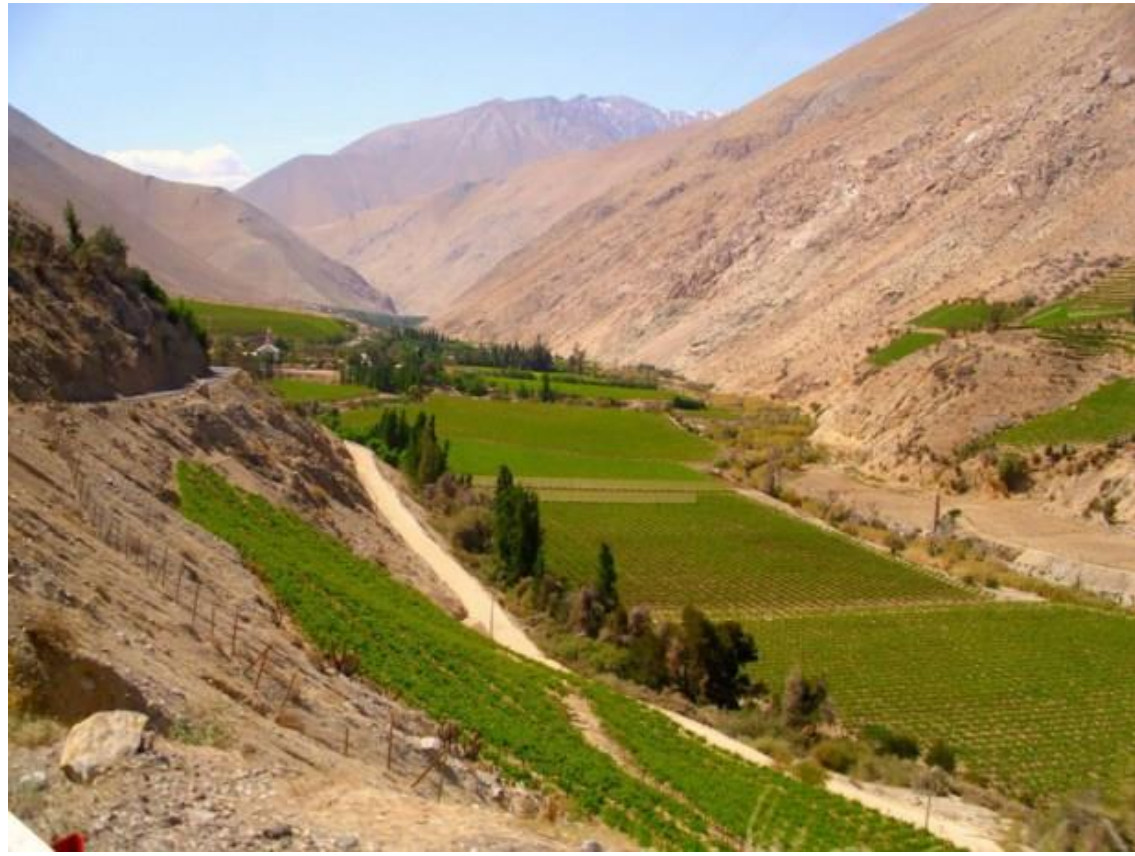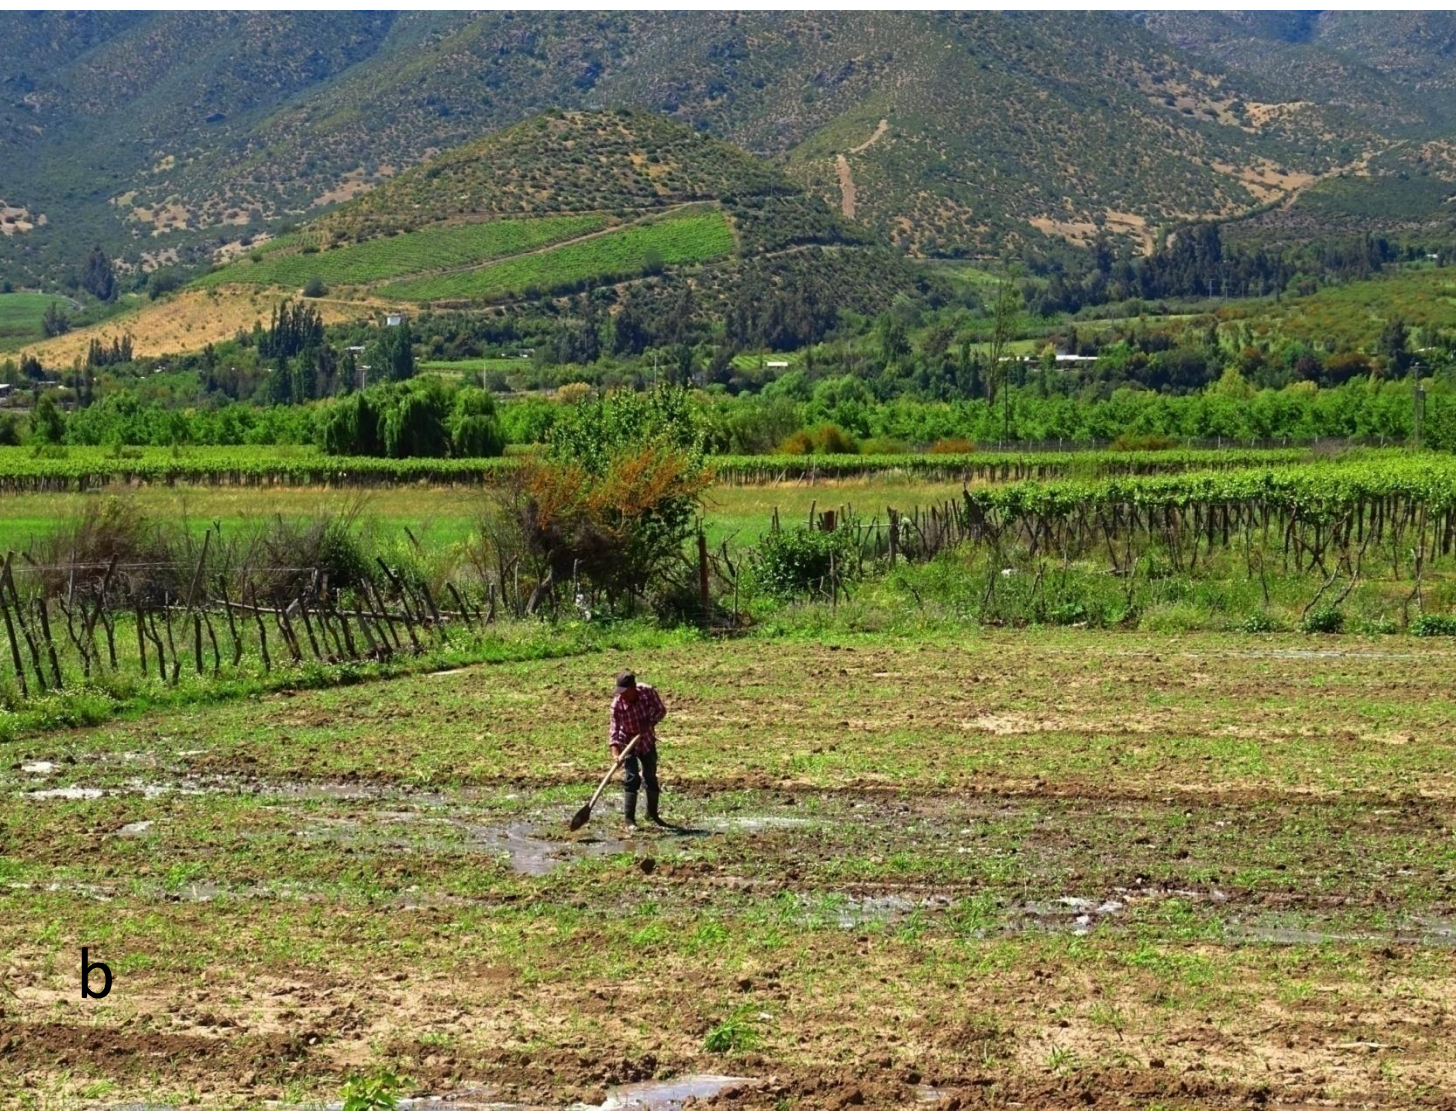

Fig. 1 The location of Coquimbo region (a) and irrigation field (b) in the Choapa Valley (Chile)

## STUDY AREA

The study has been performed in two glacial aquifers from Coquimbo region in the Choapa watershed, 250 km north of Santiago de Chile (Fig. 1a). Choapa basin extends between 31°10'–32°15'S and 70°16'–71°33'W and cover an area of ca. 7,630 km<sup>2</sup>.

The basin is bounded on the east by Chile's Andean Mountains reaching 6900 m above sea level and to the west by the Pacific Ocean. The climate of the region varies from coastal steppe at the coast to cold temperate at the headwater. The annual rainfall is scarce in Illapel (the main city) is 170 mm (region annual rainfall is 100-240 mm/yr and decreasing) whereas the annual total evapo-transpiration reaches 1,500 mm.

The average temperature of the area is around 15°C. A major control for precipitation events, in addition to the altitude, is the 5–7-a return period of the El Niño-Southern Oscillation (ENSO) phenomenon, which includes extremely rainy years (El Niño) as well as extremely dry ones (La Niña), the latter associated with highly recurrent drought events (Nuñez et al., 2011). The floodplain of Choapa is dominated by agriculture (fruits tress, vineyards) (Fig. 1b).

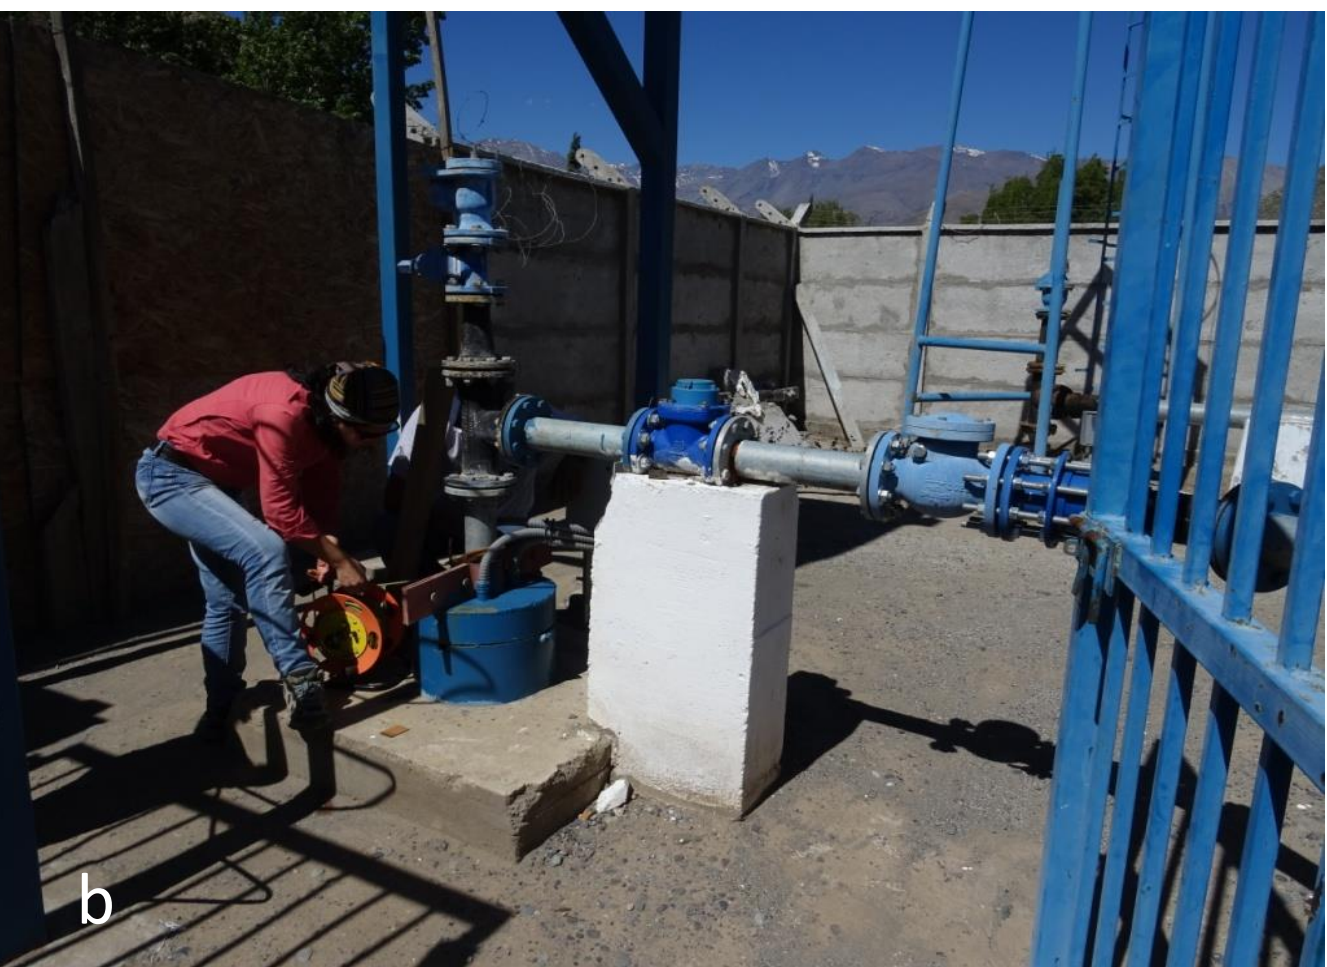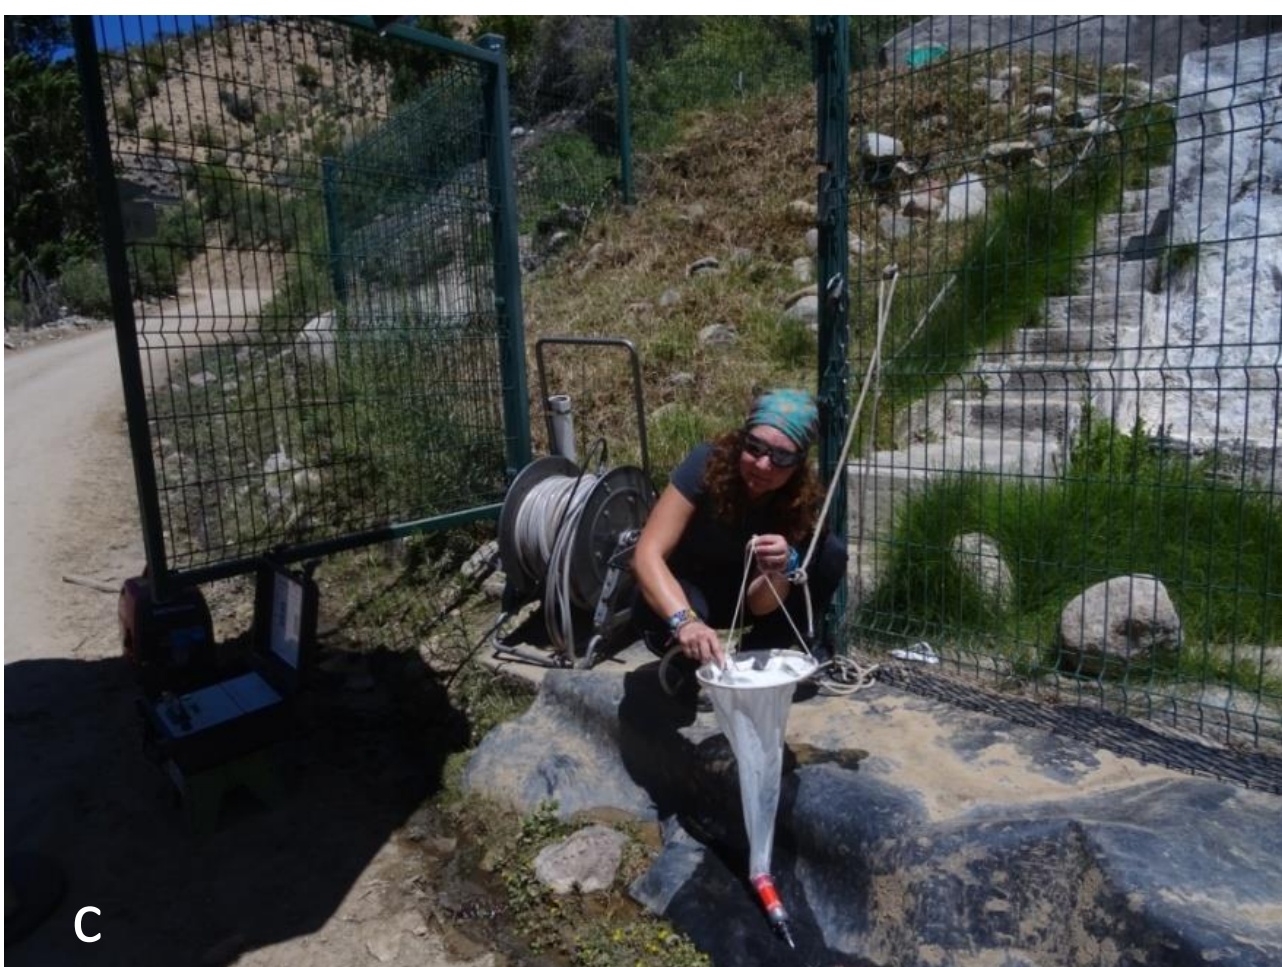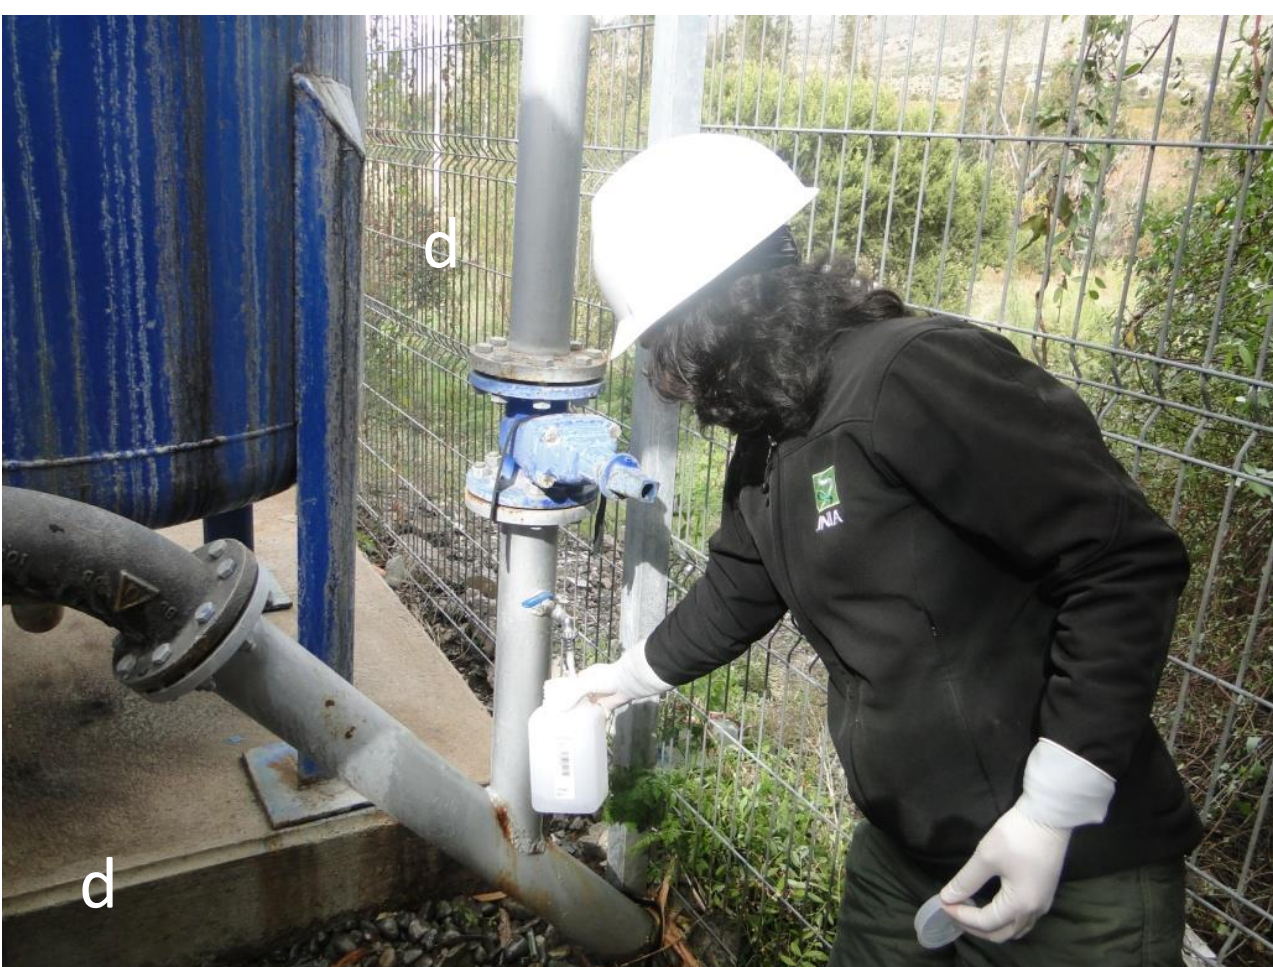

## OBJECTIVES

We here aim to provide a first assessment of environmental alterations of groundwater ecosystems from agricultural watersheds in northern Chile by specifically evaluating the effects of nitrogen load on groundwater communities and identifying the ecosystem service alterations due to agricultural activities.

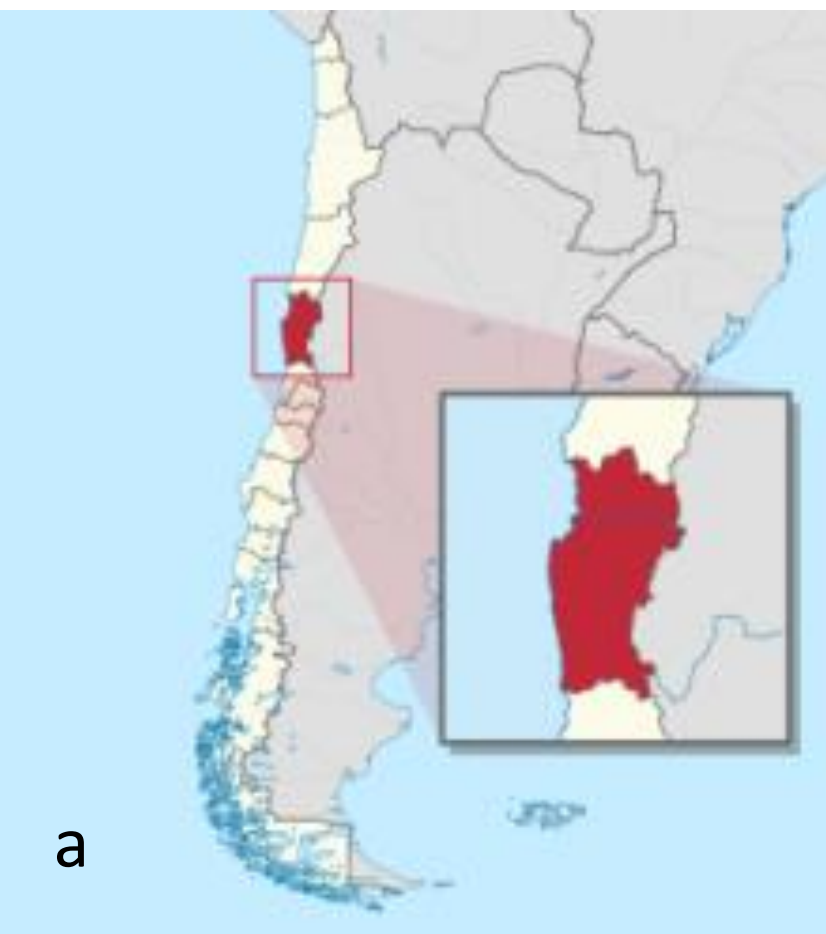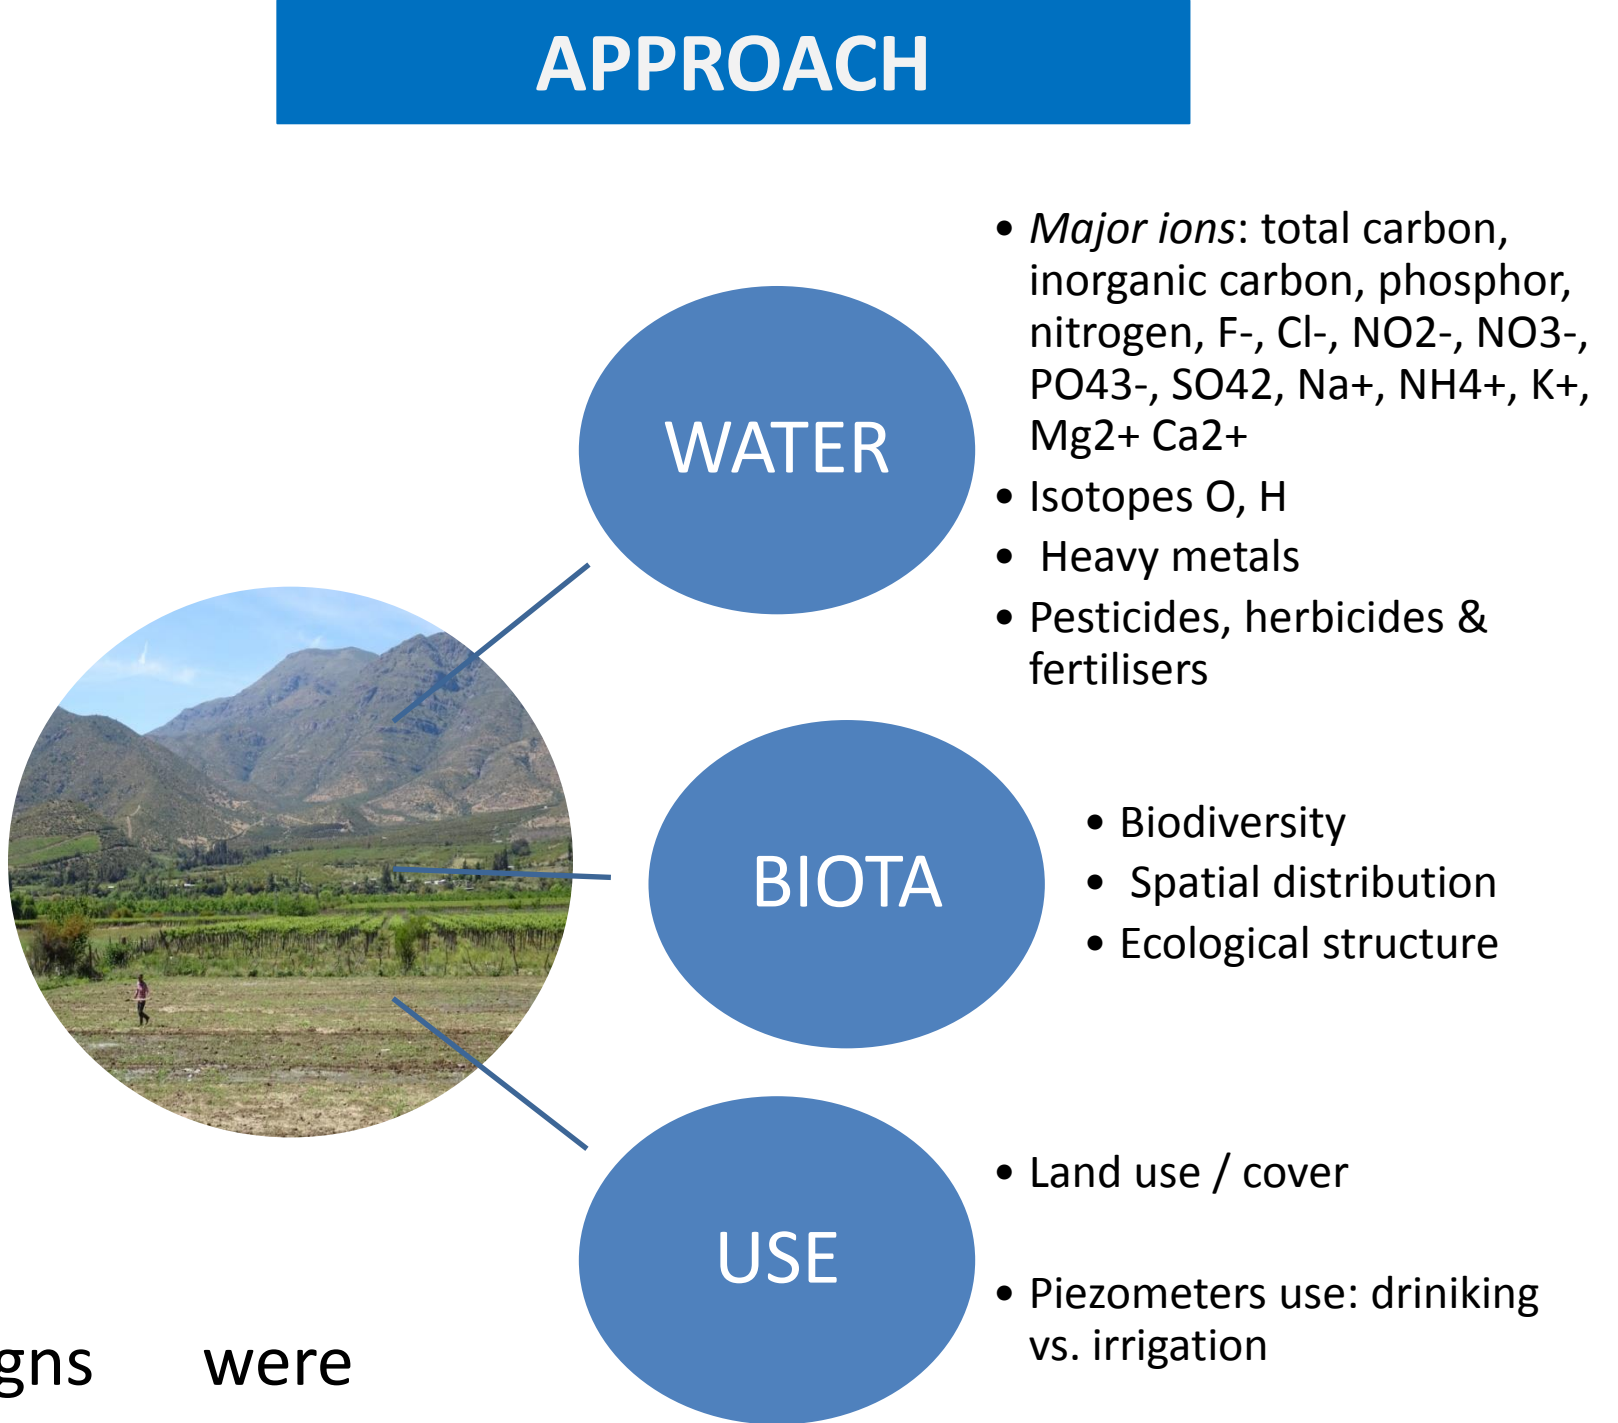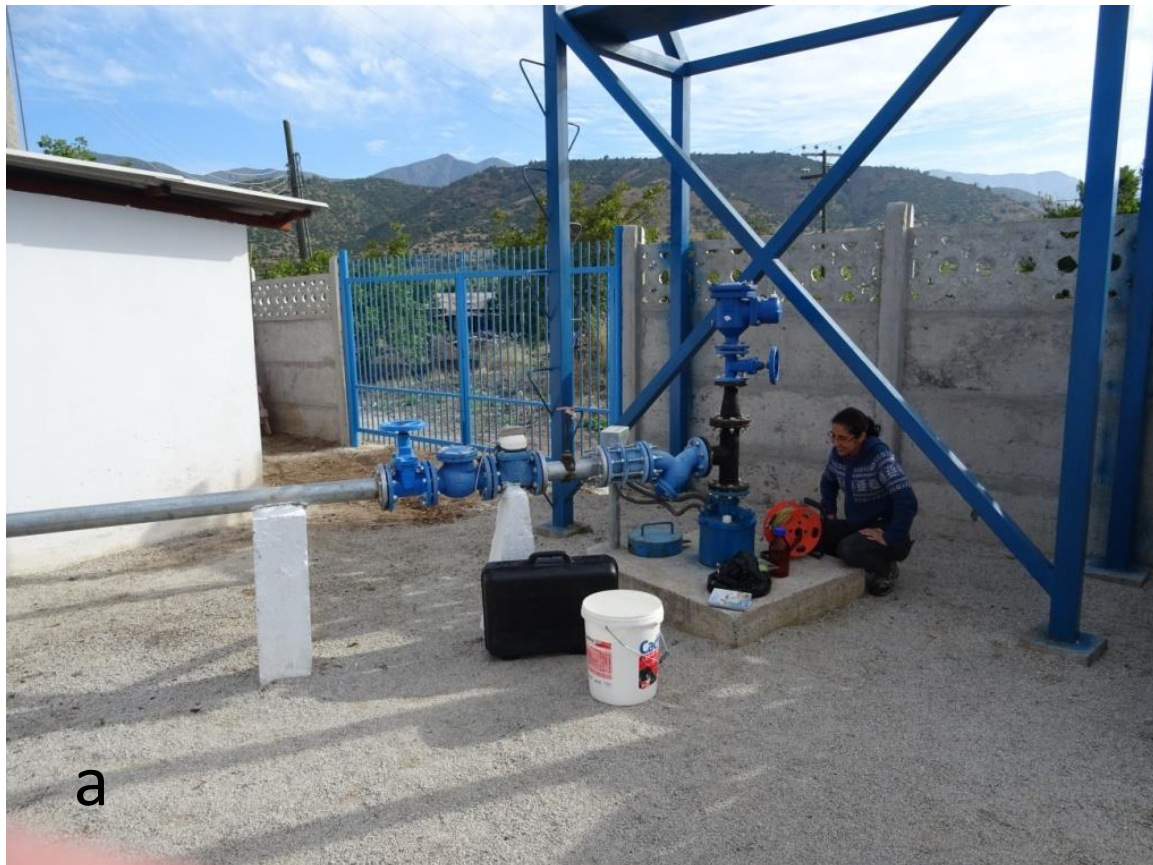

Table 1 The characteristics of the sampled boreholes from Choapa Valley, Chile

| SITE NAME     | COORDINATES E | COORDINATES S | Elevation (m a.s.l.) | AQUIFER     | Phreatic level | EC (µs/cm) | pH   | Temp (°C) | DO (mg/L in %) |
|---------------|---------------|---------------|----------------------|-------------|----------------|------------|------|-----------|----------------|
| Batuco        | 348007        | 6463920       | 1164                 | CHOAPA ALTO | 1.88           | 301        | 7.22 | 19.87     | 59             |
| Cuncumén      | 346215        | 6468701       | 1018                 | CHOAPA ALTO | 9.48           | 569        | 6.84 | 16.925    | 40.7           |
| Tranquilla    | 340966        | 6470035       | 927                  | CHOAPA ALTO | 6.53           | 527        | 6.89 | 18.53     | 62.8           |
| Lilimpo       | 325256        | 6474724       | 667                  | CHOAPA ALTO | 1.56           | 553.5      | 6.89 | 18.04     | 17             |
| Panguesillo   | 324099        | 6475756       | 660                  | CHOAPA ALTO | 4.3            | 495.5      | 6.94 | 17.51     | 25.35          |
| Santa Rosa 2  | 3148713       | 7055902       | 578                  | CHOAPA ALTO | 0.2            | 448        | 6.96 | 18.44     | 33.2           |
| El Tambo      | 309048        | 6481712       | 387                  | CHOAPA ALTO | 5.86           | 547.5      | 6.84 | 14.29     | 37.25          |
| Chuchifí      | 304930        | 6484651       | 392                  | CHOAPA ALTO | 1.36           | 786        | 6.85 | 19.1      | 26.2           |
| Pozo Sta Rosa | 317309        | 6478770       | 546                  | CHOAPA ALTO | 6              | 464        | 6.82 | 17.09     | 10.1           |
| La Colonia 1  | 3135436       | 7104894       | 441                  | ILLAPEL     | 1.9            | 1273       | 7.24 | 16.81     | 0              |
| Boldo         | 3146517       | 7059366       | 524                  | CHOAPA ALTO | 2.98           | 640        | 6.87 | 16.7      | 20.4           |
| Carcamo3      | 3135699       | 7103538       | 493                  | ILLAPEL     | 2              | 671        | 6.91 | 15.87     | 18.2           |
| Carcamo 4     | 3135483       | 7103712       | 540                  | ILLAPEL     | 0.5            | 536        | 7.4  | 15.3      | 22.7           |
| La Colonia 1  | 3153786       | 7039461       | 470                  | ILLAPEL     | 2.22           | 662        | 6.71 | 17.35     | 16.5           |
| Illapel       | 3138385       | 7110474       | 387                  | ILLAPEL     | 0.35           | 1110       | 6.86 | 17.32     | 16.7           |

## RESULTS

The hydrogological characteristics of the two aquifers are illustrated in Table 2. Due to low regional precipitations (100-240 mm/year) the aquifers are primarily recharged by snowmelt from the Andean chain and by surface runoff.

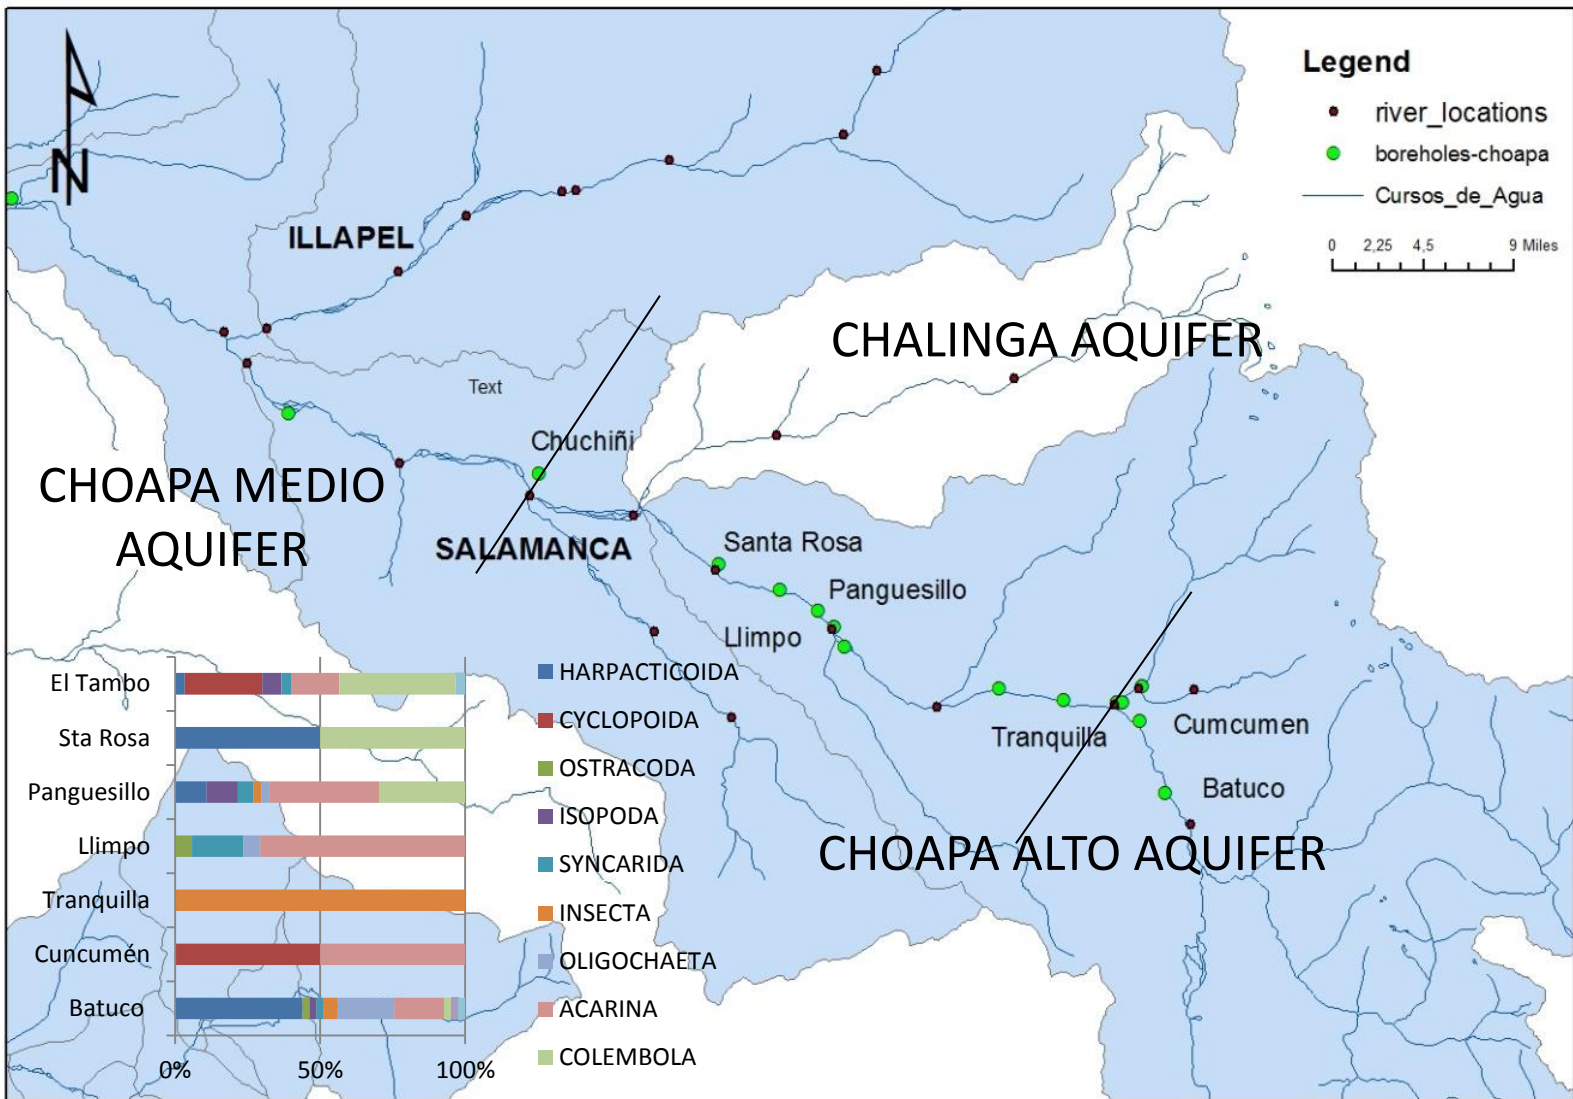

Fig. 2 Boreholes location in the Choapa Valley, Chile (a), abundance of groundwater invertebrates (b).

Table 2 Characteristics of the investigated aquifers in the Choapa Valley, Chile

|                | Characteristics                                                                                                                                            |
|----------------|------------------------------------------------------------------------------------------------------------------------------------------------------------|
| Region         | Choapa Alto and Medio (Coquimbo Region) between 31°10'S and 32°15'S; extension of 8100 km <sup>2</sup>                                                     |
| Geology        | unconsolidated deposits filled with fluvial sediments (gravel, sand, silt) + glacial and fluvioglacial sedimentation from moraines                         |
| Age            | Quaternary                                                                                                                                                 |
| Aquifers       | There are 4 aquifers in the area of study but they are hydraulically connected and is considered a unique aquifer                                          |
| Recharge       | Snowmelt, precipitations, high surface / groundwater exchanges with the Choapa River                                                                       |
| Permeability   | Low                                                                                                                                                        |
| Transmissivity | 400 y 3000 m <sup>2</sup> /day                                                                                                                             |
| Vulnerability  | High                                                                                                                                                       |
| Water quality  | High EC, high load of SO4, As, Cu and Mn surpassing the standard limits for its use as drinking water (cf. N.Ch409/2005) and for rrigation (cf. N.Ch 1333) |

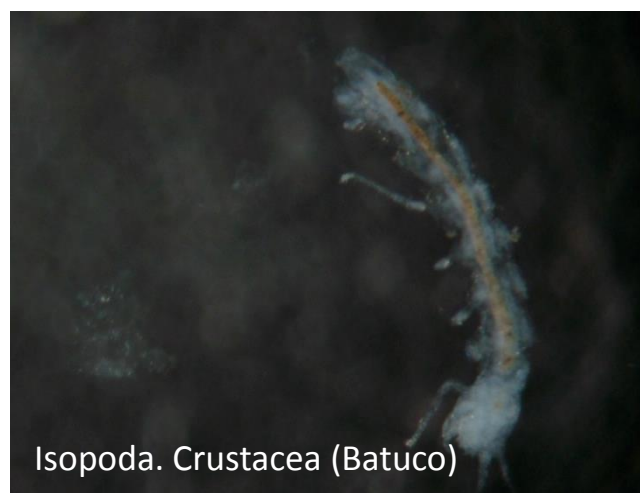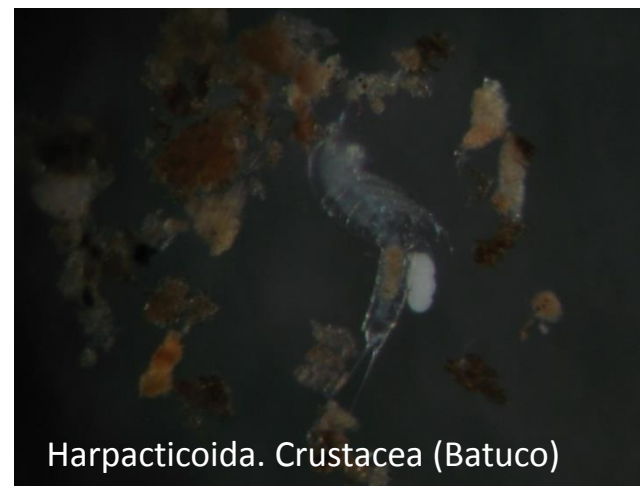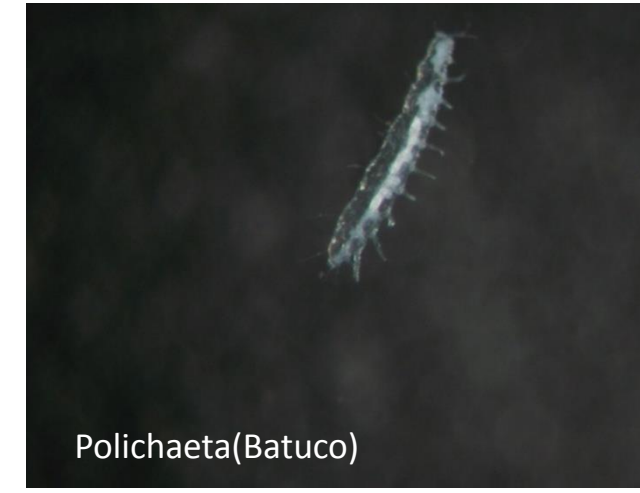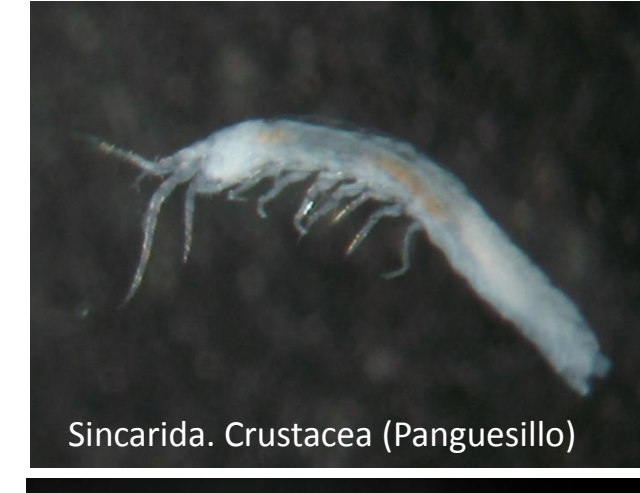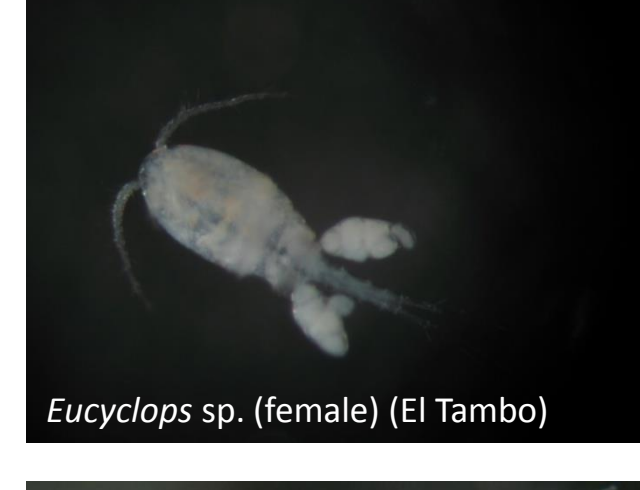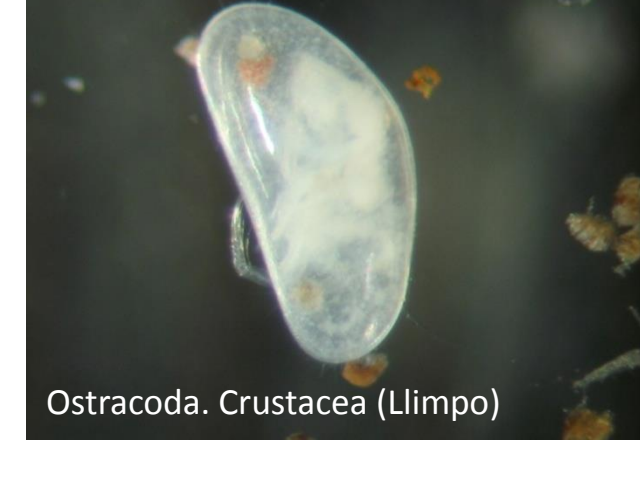

Fig. 4 Groundwater invertebrates sampled in the aquifers of the Choapa Valley, Chile

A total of 13 taxonomic groups including crustaceans (Bathynella, Amphipoda, Cyclopoida, Harpacticoida, Ostracoda and Isopoda) has been found in the sampled borehole (Figs. 2b, 4). The taxonomic richness and the presence of stygobites have been related more to groundwater level stability than to chemical water parameters indicating that over-exploitation of borehole is the primary factor influencing the groundwater fauna likely due to the negative impact on habitat suitability.

The evolution of groundwater crustacean in different biogeographic regions worldwide is reflected in a particular biodiversity underground. In these regards, Chile, by its geographic position and specific past and present climate (currently with extremely reduced precipitations) might host one of the most unique groundwater species worldwide that evolved underground in complete isolation. In the specific region of Coquimbo, the groundwater is currently under high treats due to overexploitation and contamination, and this specific fauna might disappear even before being discovered. Groundwater biota assessment is essential in understanding the impact produced by agriculture activities on groundwater as a resource and as ecosystem, a nexus that becomes more and more widely recognized.

## References

Malard, F. et al. (2004) Sampling Manual for the Assessment of Regional Groundwater Biodiversity, Pascalis Project Report  
Nuñez, J. H., K. Verbist, J. R. Wallis, M. G. Schaefer, L. Morales, and W. M. Cornelis, 2011: Regional frequency analysis for mapping drought events in north-central Chile. J. Hydrol., 405, 352–366
